# Supplementary material for: Inner C-cyanide addition and nucleophilic addition to Ni(ii) N-confused porphyrinsElectronic supplementary information (ESI) available: UV-vis spectra of 1 with and without NaOCH3. See http://www.rsc.org/suppdata/cc/b2/b211990k/
Source: Royal Society of Chemistry journal article supplement (doi:10.1039/b211990k), 2003-03-31
Supplement: b211990k.doc [file b211990k.doc]

**Electronic Supplementary Information**

**Inner C-cyanide addition and nucleophilic addition to Ni(II) N-confused porphyrins**

**Ziwei Xiao, Brian Patrick and David Dolphin***

*Department of Chemistry, University of British Columbia, 2036 Main Mall, Vancouver, BC V6T 1Z1, Canada. E-mail:* [ddolphin@qltinc.com](mailto:ddolphin@qltinc.com)

**Fig. 1**  UV-vis spectra of **1** in CH2Cl2/CH3OH (1:1) with and without NaOCH3.
